# Supplementary material for: Proximal and Distal Regions of Pathogenic Th17 Related Chromatin Loci Are Sequentially Accessible During Pathogenicity of Th17
Source: PubMed Central journal article supplement (PMC9062102; doi:10.3389/fimmu.2022.864314), 2022-04-19
Supplement: DataSheet_1.pdf [file DataSheet_1.pdf]

SUPPLEMENTARY MATERIAL

Figure S1

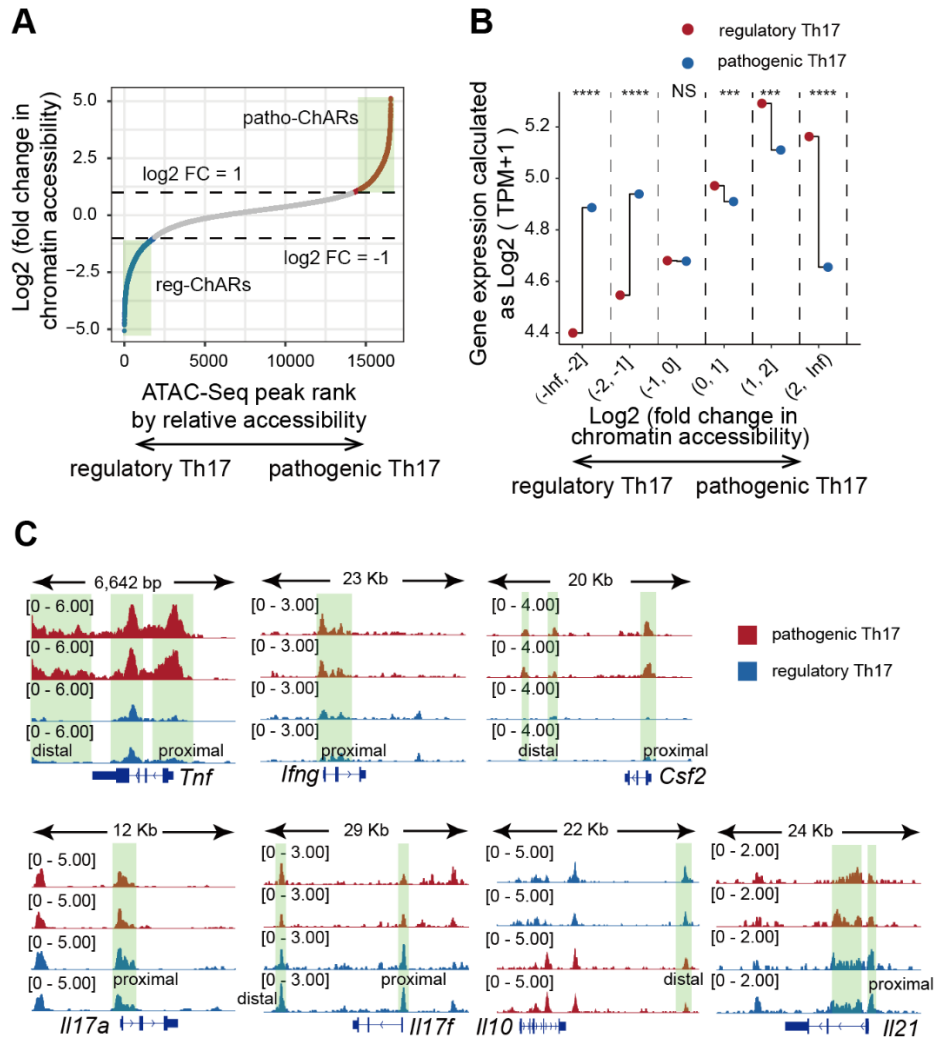

**Figure S1.** DNA accessibility in pathogenic and regulatory Th17 correlates with the expression of their related genes. **(A)** Distribution of ATAC-Seq peaks ranked by relative chromatin accessibility. Red, patho-ChARs, blue, reg-ChARs, (fold change > 2). **(B)** Average correlation between ChAR accessibility and the expression their neighboring genes in pathogenic and regulatory Th17. \*\*\*P<0.001 and \*\*\*\*P<0.0001. **(C)** ATAC-Seq tracks at the pathogenic-specific (*Tnf*, *Ifng*, *Il10* and *Csf2*) and regulatory-specific (*Il17a*, *Il17f* and *Il21*) gene loci, with differential peaks highlighted in green. proximal: TSS-proximal regions; distal: TSS-distal regions.

## Figure S2

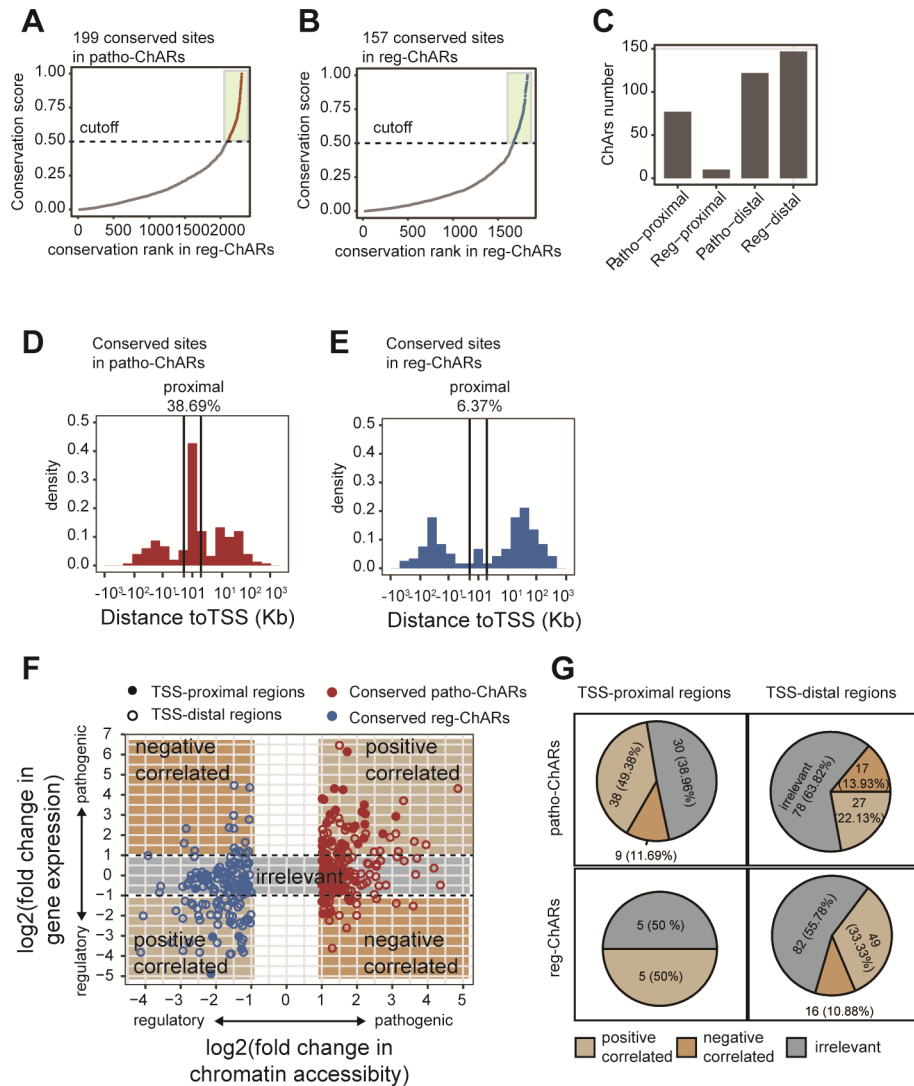

**Figure S2.** Conserved patho- and reg- ChARs display similar distribution patterns. **(A)** Conservation elbow plot of patho-ChARs. Red points denote the conserved sites, conservation score > 0.5. **(B)** Conservation elbow plot of reg-ChARs. Blue points denote the conserved sites, conservation score > 0.5. **(C)** Statistics of conserved patho-ChARs and conserved reg-ChARs in TSS-proximal and TSS-distal regions. **(D)** Distance of conserved patho-ChARs to their neighboring TSSs. Percent of ChARs found within +1 to -1 Kb of TSS were calculated. **(E)** Distance of conserved reg-ChARs to their neighboring TSSs. Percent of ChARs found within +1 to -1 Kb of TSS were calculated. **(F)** Correlation between the accessibility of conserved ChARs at TSS-proximal or TSS-distal region and the expression of their related genes. **(G)** Statistics of the correlation between patho- and reg-ChARs located at TSS-proximal or TSS-distal regions and the expression of their neighboring genes. Positively correlated ChARs, fold change > 2, negatively correlated ChARs, fold change < 0.5, expression-irrelevant ChARs, 0.5 < fold change < 2.

**Table S1**

| <b>Reg-TF</b> | <b>Reference</b>                                                                                                                                                      |
|---------------|-----------------------------------------------------------------------------------------------------------------------------------------------------------------------|
| Nfe2l2        | Kim Ohl, et al. Nuclear Factor Erythroid 2-related Factor 2 Deficiency Exacerbates Lupus Nephritis in B6/lpr mice by Regulating Th17 Cell Function                    |
| Nr4a2         | Ben J. E. Raveney, et al. Nuclear receptor NR4A2 orchestrates Th17 cell-mediated autoimmune inflammation via IL-21 signalling                                         |
| Mafk          | not reported                                                                                                                                                          |
| Junb          | Tiffany M. Carr, et al. JunB promotes Th17 cell identity and restrains alternative CD4+ T-cell programs during inflammation                                           |
| Maff          | not reported                                                                                                                                                          |
| Maf           | Kojiro Sato, et al. Marked induction of c-Maf protein during Th17 cell differentiation and its implication in memory Th cell development                              |
| Atf3          | Doaa Glal, et al. ATF3 Sustains IL-22-Induced STAT3 Phosphorylation to Maintain Mucosal Immunity Through Inhibiting Phosphatases                                      |
| Nr4a1         | Li-Mei Wang, et al. Nr4a1 plays a crucial modulatory role in Th1/Th17 cell responses and CNS autoimmunity                                                             |
| Tcf7          | Pawel Muranski, et al. Th17 cells are long-lived and retain a stem cell-like molecular signature                                                                      |
| Mafb          | Dhouha Daassi, et al. Differential expression patterns of MafB and c-Maf in macrophages in vivo and in vitro                                                          |
| Fosb          | Jin角度 Zhu, et al. Differentiation of Effector CD4 T Cell Populations*                                                                                                 |
| Fosl2         | Shetty, A, et al. Interactome Networks of FOSL1 and FOSL2 in Human Th17 Cells                                                                                         |
| Bach1         | Kim, S. K, et al. The novel Bach1 inhibitor HPP971 uniquely activates Nrf2 and reduces disease severity in a mouse model of experimental autoimmune encephalomyelitis |
| Mafg          | not reported                                                                                                                                                          |
| Fos           | Jin角度 Zhu, et al. Differentiation of Effector CD4 T Cell Populations*                                                                                                 |
| Jund          | Jin角度 Zhu, et al. Differentiation of Effector CD4 T Cell Populations*                                                                                                 |
| Jun           | Jin角度 Zhu, et al. Differentiation of Effector CD4 T Cell Populations*                                                                                                 |
| Rora          | June-Yong Lee, et al. RORa enforces stability of the T-helper-17 cell effector program                                                                                |
| Batf          | Schraml BU, et al. The AP-1 transcription factor Batf controls T(H)17 differentiation                                                                                 |
| Irf3          | Denise C Fitzgerald, et al. Interferon regulatory factor (IRF) 3 is critical for the development of experimental autoimmune encephalomyelitis                         |
| Foxj3         | not reported                                                                                                                                                          |
| Batf3         | Wonyong Lee, et al. The transcription factor Batf3 inhibits the differentiation of regulatory T cells in the periphery                                                |
| Nfkb2         | Wai Po Chong, et al. The Cytokine IL-17A Limits Th17 Pathogenicity via a Negative Feedback Loop Driven by Autocrine Induction of IL-24                                |
| Atf2          | not reported                                                                                                                                                          |
| Nr1d2         | not reported                                                                                                                                                          |
| Rela          | Xuebin Qu, et al. TLR4-RelA-miR-30a signal pathway regulates Th17 differentiation during experimental autoimmune encephalomyelitis development                        |
| Relb          | Ievgen O. Koliesnik, et al. RelB regulates Th17 differentiation in a cell-intrinsic manner                                                                            |

| <b>Patho-TF</b> | <b>Reference</b>                                                                                                                                                 |
|-----------------|------------------------------------------------------------------------------------------------------------------------------------------------------------------|
| Mxi1            | Jing Chen, et al. Interaction of RNA-binding protein HuR and miR-466i regulates GM-CSF expression                                                                |
| Ctcf            | Yu, Xiaofei et al. TH17 cell differentiation is regulated by the circadian clock                                                                                 |
| Usf2            | Dan Hu, et al. Aberrant expression of USF2 in refractory rheumatoid arthritis and its regulation of proinflammatory cytokines in Th17 cells                      |
| Fli1            | Miura S, et al. Fli1 deficiency suppresses RALDH1 activity of dermal dendritic cells and related induction of regulatory T cells: a possible role in scleroderma |

|         |                                                                                                                                                              |
|---------|--------------------------------------------------------------------------------------------------------------------------------------------------------------|
| Elf1    | not reported                                                                                                                                                 |
| Zfp322a | not reported                                                                                                                                                 |
| Elk1    | not reported                                                                                                                                                 |
| Usf1    | Ratajewski M, et al. Upstream stimulating factors regulate the expression of ROR $\gamma$ T in human lymphocytes                                             |
| Elk4    | Ping Hsien Lee, et al. The Transcription Factor E74-Like Factor 4 Suppresses Differentiation of Proliferating CD4 <sup>+</sup> T Cells to the Th17 Lineage.  |
| Gabpa   | not reported                                                                                                                                                 |
| Tfe3    | not reported                                                                                                                                                 |
| Srebf2  | Guoliang Cui, et al. Liver X receptor (LXR) mediates negative regulation of mouse and human Th17 differentiation                                             |
| Klf4    | Lori Lebson, et al. Cutting edge: The transcription factor Kruppel-like factor 4 regulates the differentiation of Th17 cells independently of ROR $\gamma$ t |
| Tbx21   | Yuhong, et al. T-bet is essential for encephalitogenicity of both Th1 and Th17 cells                                                                         |
| Zeb1    | Qian Y, et al. ZEB1 promotes pathogenic Th1 and Th17 cell differentiation in multiple sclerosis                                                              |
